# Supplementary material
Source: Springer Nature journal article supplement (https://www.springermedizin.de/resource/supplementary/12913_2008_1152_MOESM1_ESM.pdf/9527774)
Supplement: MOESM1 [file 9527774]

**Trend in Total Profit Margin by SES Index**

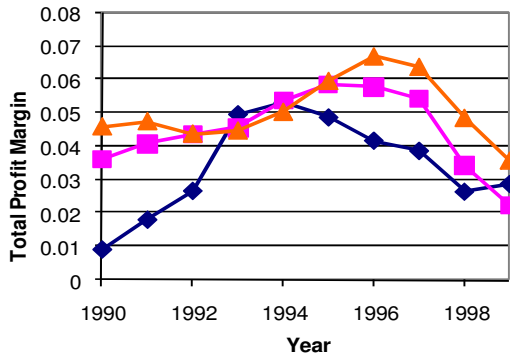

**Trend in Total Operating Expenditure by SES Index**

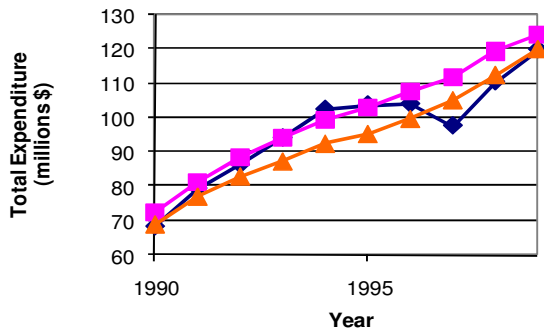

**Trend in Total Profit Margin by Medicaid Intensity**

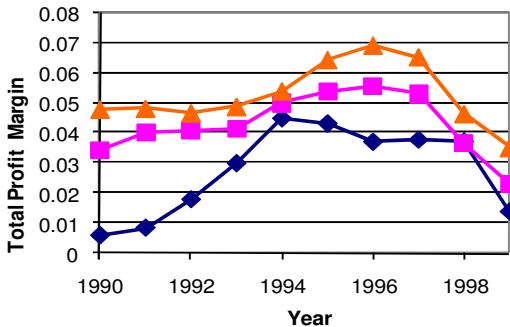

**Trend in Total Operating Expenditure by Medicaid Intensity**

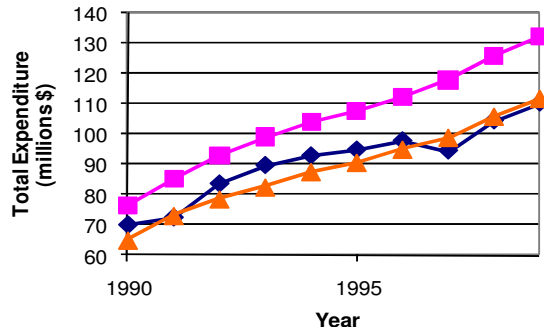

◆ Top 5th percentile    ■ Top 50th percentile    ▲ Bottom 50th percentile
